# Supplementary material
Source: Springer Nature journal article supplement (https://www.springermedizin.de/resource/supplementary/12872_2014_786_MOESM7_ESM.pdf/9430498)
Supplement: MOESM7 [file 9430498]

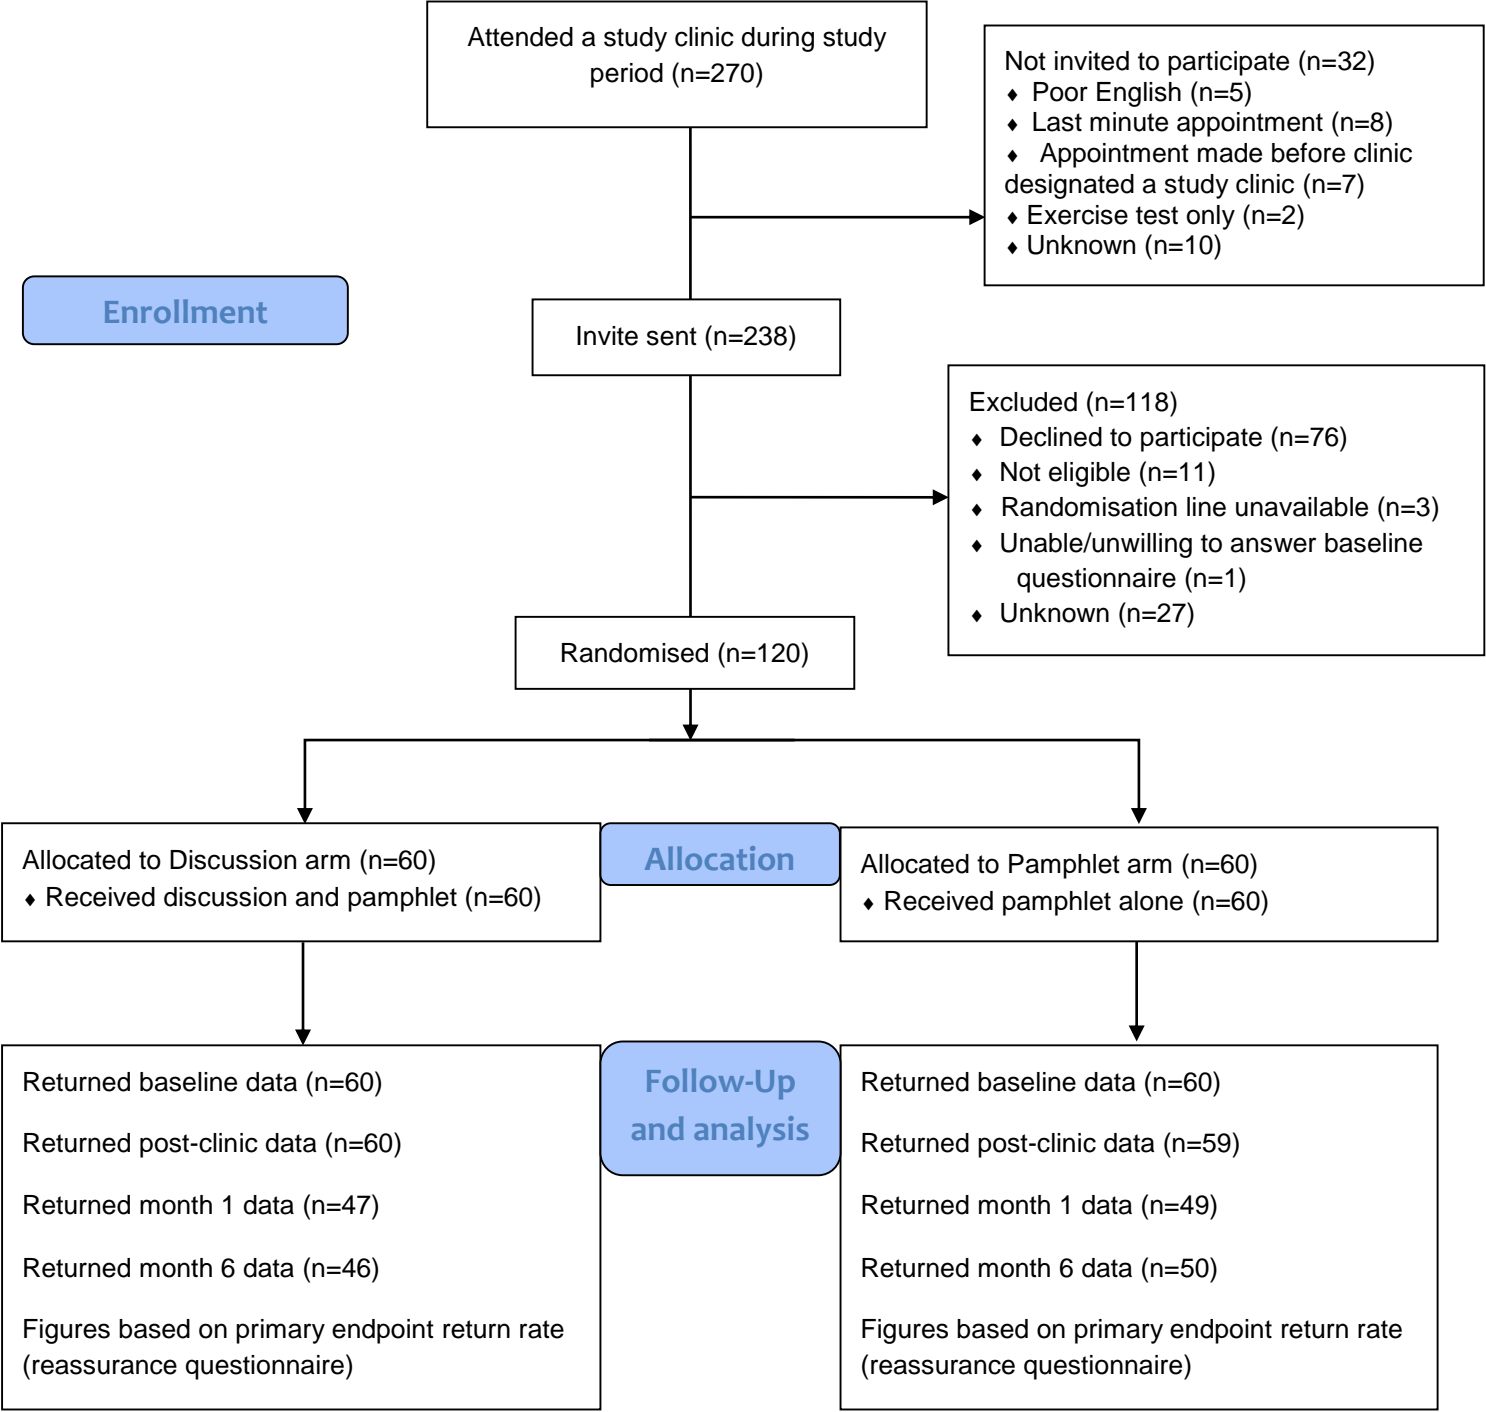

**Enrollment**

Attended a study clinic during study period (n=270)

- Not invited to participate (n=32)
  - ◆ Poor English (n=5)
  - ◆ Last minute appointment (n=8)
  - ◆ Appointment made before clinic designated a study clinic (n=7)
  - ◆ Exercise test only (n=2)
  - ◆ Unknown (n=10)

Invite sent (n=238)

- Excluded (n=118)
  - ◆ Declined to participate (n=76)
  - ◆ Not eligible (n=11)
  - ◆ Randomisation line unavailable (n=3)
  - ◆ Unable/unwilling to answer baseline questionnaire (n=1)
  - ◆ Unknown (n=27)

Randomised (n=120)

**Allocation**

Allocated to Discussion arm (n=60)  
◆ Received discussion and pamphlet (n=60)

Allocated to Pamphlet arm (n=60)  
◆ Received pamphlet alone (n=60)

**Follow-Up and analysis**

Returned baseline data (n=60)  
Returned post-clinic data (n=60)  
Returned month 1 data (n=47)  
Returned month 6 data (n=46)  
Figures based on primary endpoint return rate (reassurance questionnaire)

Returned baseline data (n=60)  
Returned post-clinic data (n=59)  
Returned month 1 data (n=49)  
Returned month 6 data (n=50)  
Figures based on primary endpoint return rate (reassurance questionnaire)
